# Supplementary material for: Two-stage hierarchical clustering for analysis and classification of mineral sunscreen and naturally occurring nanoparticles in river water using single-particle ICP-TOFMS
Source: Royal Society of Chemistry journal article supplement (doi:10.1039/d4en00288a), 2024-01-01
Supplement: d4en00288a1.pdf [file d4en00288a1.pdf]

## Supplemental information

### Two-stage hierarchical clustering for analysis and classification of mineral sunscreen and naturally occurring nanoparticles in river water using single-particle ICP-TOFMS

Hark Karkee and Alexander Gundlach-Graham\*

Department of Chemistry, Iowa State University, Ames, Iowa

Address correspondence: [alexgg@iastate.edu](mailto:alexgg@iastate.edu)

## Table of Contents

|                                                                                                                                                                                  |            |
|----------------------------------------------------------------------------------------------------------------------------------------------------------------------------------|------------|
| <b>Table S1</b> Dilution scheme for quantification of spiked SS particles in RW .....                                                                                            | <b>S2</b>  |
| <b>Table S2</b> Dilution scheme for quantification of spiked SS particles in RW enriched with Ti-nanomaterials .....                                                             | <b>S2</b>  |
| <b>Table S3</b> Element names, isotopes used, absolute sensitivities and critical mass and concentration in droplets .....                                                       | <b>S3</b>  |
| <b>Table S4</b> Instrument parameters .....                                                                                                                                      | <b>S4</b>  |
| <b>Table S5</b> Element and Sample Specific Critical Masses for spICP-TOFMS analysis of neat suspension of sunscreen and river water in figure 1 .....                           | <b>S5</b>  |
| <b>Table S6</b> Element and Sample Specific Critical Masses for spICP-TOFMS analysis of neat sunscreen, river water, and mixtures of sunscreen and river water in figure 3 ..... | <b>S6</b>  |
| <b>Figure S1</b> SEM images and EDS spectrum of sunscreen particles .....                                                                                                        | <b>S7</b>  |
| <b>Figure S2</b> Boxplots showing mass distribution of Zn-bearing and Al-bearing particles in SS and RW .....                                                                    | <b>S8</b>  |
| <b>Figure S3</b> Measurement of Ti, Zn and TiZn particles extracted from sunscreen using ultrasonication and water bath sonication .....                                         | <b>S8</b>  |
| <b>Figure S4</b> Dendrogram resulting from the two-stage unsupervised hierarchical clustering analysis (HCA) where SS is spiked in RW enriched with Ti-nanomaterials .....       | <b>S9</b>  |
| <b>Figure S5</b> Quantification of Ti-bearing NPs and Zn-bearing NPs spiked from sunscreen into RW enriched with Ti-nanomaterials .....                                          | <b>S10</b> |

Table S1: Dilution scheme for the spiking of sunscreen particles into river water. Results for quantification of SS particles are provided in Figure 5.

| Quantification of spiked sunscreen in 50X diluted river water      |                            |                                                                                       |                                                             |
|--------------------------------------------------------------------|----------------------------|---------------------------------------------------------------------------------------|-------------------------------------------------------------|
| ENP PNCs in stock<br>(Particles per mL <sup>-1</sup> )<br>1.00E+06 |                            |                                                                                       |                                                             |
| Sample no.                                                         | Volume of river water (μL) | Volume of Sunscreen stock suspension (diluted in 5 ng mL <sup>-1</sup> Cs water) (μL) | Volume of DI water containing 5 ng mL <sup>-1</sup> Cs (μL) |
| S1                                                                 | 200                        | 10                                                                                    | 9790                                                        |
| S2                                                                 | 200                        | 50                                                                                    | 9750                                                        |
| S3                                                                 | 200                        | 250                                                                                   | 9550                                                        |
| S4                                                                 | 200                        | 500                                                                                   | 9300                                                        |
| S5                                                                 | 200                        | 2500                                                                                  | 7300                                                        |
| S6                                                                 | 200                        | 5000                                                                                  | 4800                                                        |

Table S2: Dilution scheme for the spiking of sunscreen particles in river water with added Ti-minerals (biotite, ilmenite and rutile). Results for quantification of SS particles are provided in Figure S5.

| Quantification of spiked sunscreen in 50X diluted river water containing added Ti-minerals |                            |                                                                                       |                                                                                 |                                                             |
|--------------------------------------------------------------------------------------------|----------------------------|---------------------------------------------------------------------------------------|---------------------------------------------------------------------------------|-------------------------------------------------------------|
|                                                                                            |                            | ENP PNCs in stock<br>(Particles per mL <sup>-1</sup> )<br>1.00E+06                    | NNP PNCs in stock<br>(Particles per mL <sup>-1</sup> )<br>1.00E+05              |                                                             |
| Sample no.                                                                                 | Volume of river water (μL) | Volume of Sunscreen stock suspension (diluted in 5 ng mL <sup>-1</sup> Cs water) (μL) | Volume of NNP stock suspension (diluted in 5 ng mL <sup>-1</sup> Cs water) (μL) | Volume of DI water containing 5 ng mL <sup>-1</sup> Cs (μL) |
| S1                                                                                         | 200                        | 10                                                                                    | 1000                                                                            | 8790                                                        |
| S2                                                                                         | 200                        | 50                                                                                    | 1000                                                                            | 8750                                                        |
| S3                                                                                         | 200                        | 100                                                                                   | 1000                                                                            | 8700                                                        |
| S4                                                                                         | 200                        | 250                                                                                   | 1000                                                                            | 8550                                                        |
| S5                                                                                         | 200                        | 500                                                                                   | 1000                                                                            | 8300                                                        |
| S6                                                                                         | 200                        | 2500                                                                                  | 1000                                                                            | 6300                                                        |
| S7                                                                                         | 200                        | 5000                                                                                  | 1000                                                                            | 3800                                                        |

Table S3: Concentrations of elements in online microdroplet calibration solution. Typical sensitivity and critical mass values obtained with spICP-TOFMS analysis.

| Element Name | Isotopes Used                                              | Sensitivity (Tofcts/g) | $X_{C,sp}^{mass}$ (g) | Concentration in droplets (ng mL <sup>-1</sup> ) |
|--------------|------------------------------------------------------------|------------------------|-----------------------|--------------------------------------------------|
| Mg           | <sup>24</sup> Mg                                           | 2.23E+16               | 2.37E-15              | 25.3                                             |
| Al           | <sup>27</sup> Al                                           | 2.01E+16               | 3.80E-16              | 25.6                                             |
| Ti           | <sup>46</sup> Ti or <sup>48</sup> Ti                       | 1.12E+17               | 1.71E-16              | 25.8                                             |
| V            | <sup>51</sup> V                                            | 1.76E+17               | 8.54E-17              | 25.6                                             |
| Mn           | <sup>55</sup> Mn                                           | 1.63E+17               | 8.31E-17              | 25.5                                             |
| Fe           | <sup>56</sup> Fe                                           | 1.85E+17               | 8.61E-17              | 25.4                                             |
| Co           | <sup>59</sup> Co                                           | 2.43E+17               | 4.29E-17              | 25.5                                             |
| Zn           | <sup>66</sup> Zn                                           | 2.16E+16               | 5.26E-16              | 25.5                                             |
| Y            | <sup>89</sup> Y                                            | 2.04E+17               | 3.83E-17              | 25.4                                             |
| Zr           | <sup>90</sup> Zr                                           | 1.73E+17               | 3.98E-17              | 25.6                                             |
| Nb           | <sup>93</sup> Nb                                           | 3.04E+17               | 2.23E-17              | 25.6                                             |
| Cs           | <sup>133</sup> Cs                                          | 2.16E+17               | NA                    | 25.3                                             |
| La           | <sup>139</sup> La                                          | 4.65E+17               | 1.19E-17              | 25.5                                             |
| Nd           | <sup>146</sup> Nd                                          | 4.90E+16               | 1.13E-16              | 25.3                                             |
| Ce           | <sup>140</sup> Ce                                          | 4.26E+17               | 1.42E-17              | 25.5                                             |
| Ta           | <sup>181</sup> Ta                                          | 3.49E+17               | 1.49E-17              | 25.5                                             |
| W            | <sup>182</sup> W                                           | 1.29E+17               | 3.89E-17              | 25.7                                             |
| Pb           | <sup>206</sup> Pb, <sup>207</sup> Pb and <sup>208</sup> Pb | 2.36E+17               | 4.17E-17              | 25.4                                             |

Table S4: Instrument parameters

| <b>Online Microdroplet Parameters</b>       |                          |
|---------------------------------------------|--------------------------|
| Droplet Size                                | 69.93 $\mu\text{m}$      |
| Falling tube gas (Ar)                       | 19 $\text{mL min}^{-1}$  |
| Falling tube gas (He)                       | 360 $\text{mL min}^{-1}$ |
|                                             |                          |
| <b>ICP Parameters</b>                       |                          |
| Spray Chamber                               | Baffled cyclonic quartz  |
| Nebulizer                                   | PFA PrepFAST             |
| Nebulizer gas                               | 0.79 $\text{L min}^{-1}$ |
| Auxillary gas                               | 1.13 $\text{L min}^{-1}$ |
| Cool gas                                    | 14.5 $\text{L min}^{-1}$ |
| RF power                                    | 1500 W                   |
| Sampling depth                              | 4.42 mm                  |
|                                             |                          |
| <b>Mass Spectrometer Parameters</b>         |                          |
| Extraction Lens                             | -203 V                   |
| CCT mass                                    | 222 V                    |
| CCT Bias                                    | -4.0 V                   |
| CCT H <sub>2</sub> flow rate                | 6 $\text{mL min}^{-1}$   |
| Notch filter (m/z)                          | 17.3, 31, 37, 38.2       |
| Average spectrum acquisition rate           | 838 Hz                   |
| Time resolution                             | 1.19 ms                  |
| Number mass spectra averaged per time point | 99                       |

Table S5: Element and sample-specific critical masses for spICP-TOFMS analyses of neat suspensions of SS and RW (see Fig. 1)

|                | <b>Critical Masses<br/>(ag)</b> |                      |
|----------------|---------------------------------|----------------------|
| <b>Element</b> | <b>SS<br/>(neat)</b>            | <b>RW<br/>(neat)</b> |
| Mg             | 245                             | 2695                 |
| Al             | 140                             | 288                  |
| Ti             | 42                              | 212                  |
| V              | 164                             | 164                  |
| Mn             | 38                              | 64                   |
| Fe             | 77                              | 97                   |
| Co             | 31                              | 35                   |
| Cu             | 105                             | 144                  |
| Zn             | 319                             | 731                  |
| Y              | 22                              | 35                   |
| Zr             | 32                              | 43                   |
| Nb             | 18                              | 29                   |
| La             | 9                               | 14                   |
| Nd             | 86                              | 99                   |
| Ce             | 8                               | 15                   |
| Ta             | 18                              | 44                   |
| W              | 32                              | 46                   |
| Pb             | 26                              | 32                   |

Table S6: Element and sample-specific critical masses (ag) for spICP-TOFMS analyses of neat suspensions of SS and RW and mixed samples (S1-S6) used for HCA analysis (see Fig. 3) and quantification of SS particles in RW samples (see Fig. 5)

|                | <b>Sample-specific Critical Masses (ag)</b> |           |           |           |           |           |           |           |
|----------------|---------------------------------------------|-----------|-----------|-----------|-----------|-----------|-----------|-----------|
| <b>Element</b> | <b>SS</b>                                   | <b>RW</b> | <b>S1</b> | <b>S2</b> | <b>S3</b> | <b>S4</b> | <b>S5</b> | <b>S6</b> |
| Mg             | 705                                         | 2366      | 2150      | 2186      | 1936      | 2095      | 2012      | 2014      |
| Al             | 482                                         | 380       | 429       | 277       | 242       | 298       | 275       | 271       |
| Ti             | 72                                          | 171       | 170       | 172       | 165       | 169       | 156       | 145       |
| V              | 159                                         | 85        | 85        | 79        | 79        | 79        | 75        | 74        |
| Mn             | 83                                          | 83        | 75        | 60        | 73        | 82        | 80        | 81        |
| Fe             | 203                                         | 86        | 98        | 121       | 98        | 100       | 156       | 129       |
| Co             | 40                                          | 43        | 40        | 30        | 31        | 36        | 38        | 34        |
| Cu             | 247                                         | 169       | 159       | 135       | 192       | 194       | 164       | 178       |
| Zn             | 919                                         | 526       | 566       | 520       | 569       | 575       | 928       | 784       |
| Y              | 33                                          | 38        | 38        | 39        | 41        | 42        | 41        | 39        |
| Zr             | 40                                          | 40        | 42        | 40        | 41        | 44        | 43        | 44        |
| Nb             | 17                                          | 22        | 23        | 22        | 25        | 26        | 25        | 23        |
| La             | 16                                          | 12        | 13        | 13        | 14        | 13        | 18        | 14        |
| Nd             | 106                                         | 113       | 110       | 111       | 116       | 116       | 116       | 116       |
| Ce             | 33                                          | 14        | 19        | 17        | 16        | 16        | 32        | 21        |
| Ta             | 15                                          | 15        | 15        | 15        | 16        | 16        | 16        | 16        |
| W              | 37                                          | 39        | 41        | 41        | 42        | 42        | 42        | 42        |
| Pb             | 52                                          | 42        | 34        | 30        | 29        | 31        | 30        | 31        |

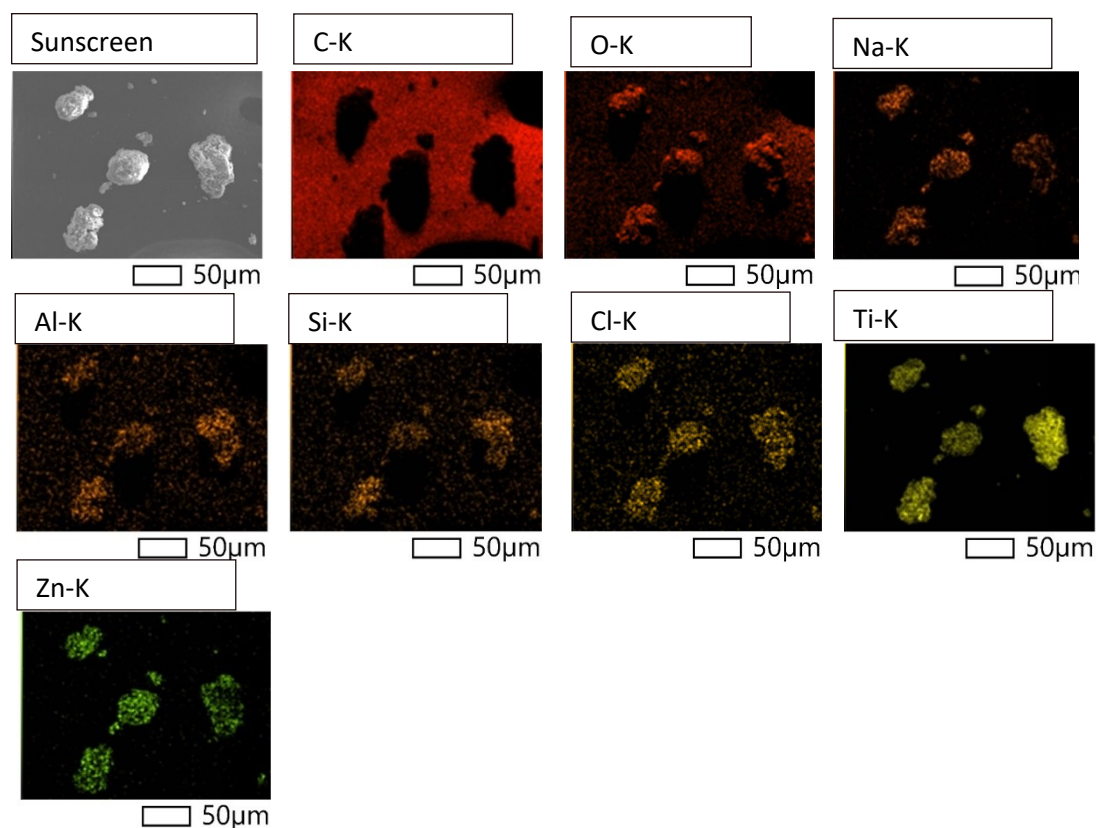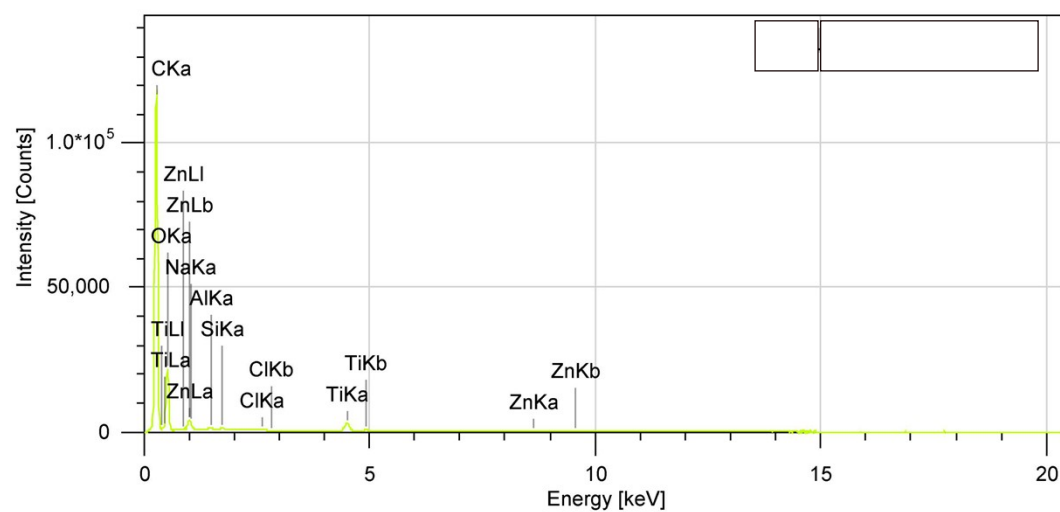

Figure S1: SEM images and EDS spectrum of sunscreen particles

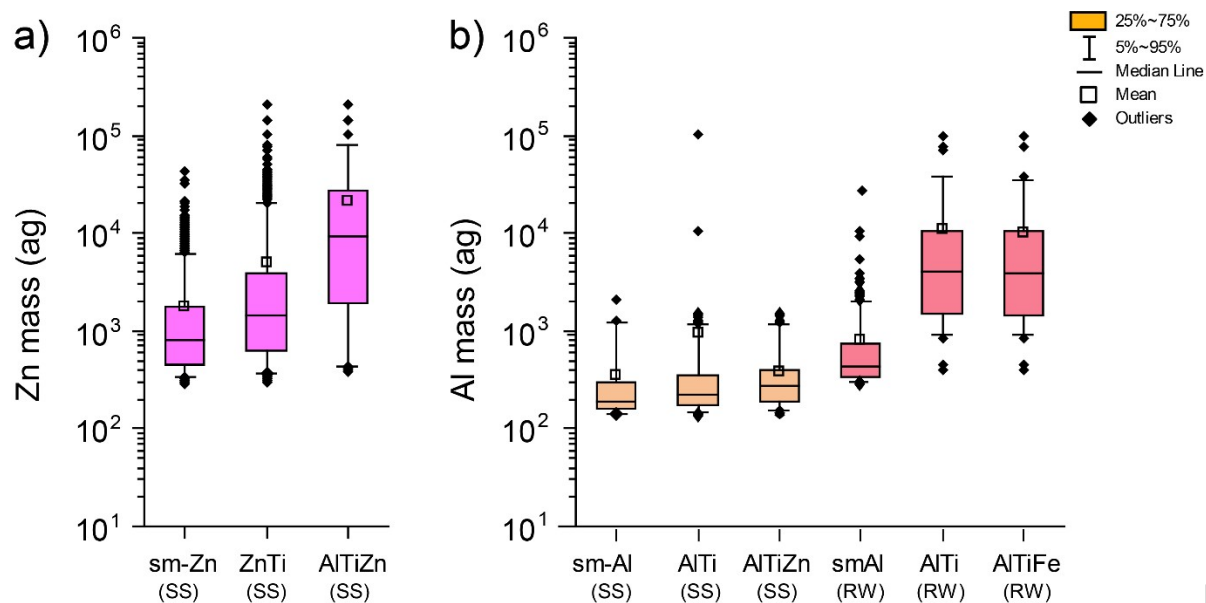

Figure S2: **a)** Boxplots showing mass distribution of Zn in particles measured with differing elemental signatures in sunscreen (SS). **b)** Mass distribution of Al in sunscreen and river water (RW) particles.

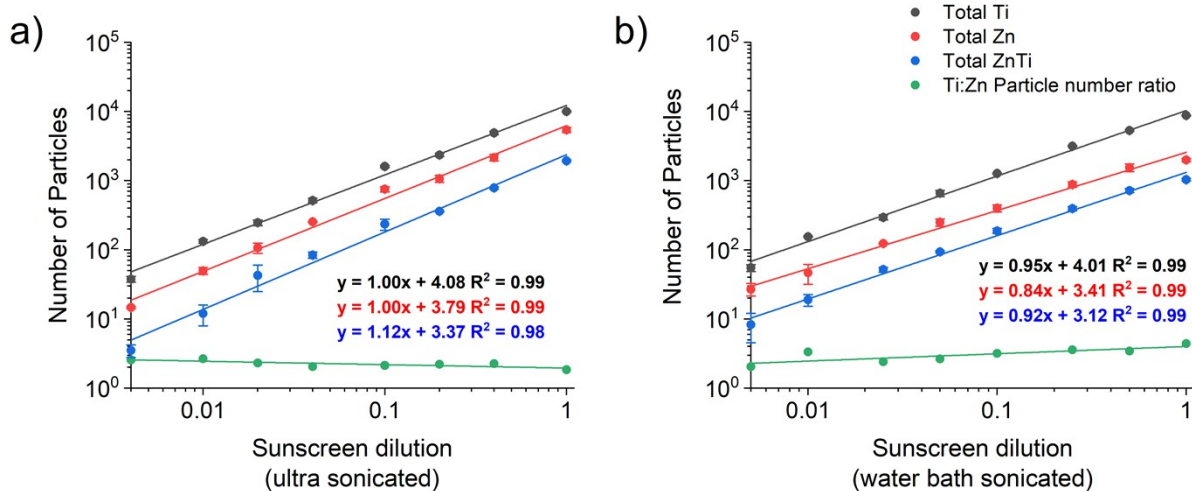

Figure S3: Numbers of Ti, Zn, and ZnTi particles measured by spICP-TOFMS after particles from the neat sunscreen suspension were extracted using ultrasonication (a) and water bath sonication (b). Linear response of all measured particle types indicates TiZn aggregates are real signals and are not loosely bound.

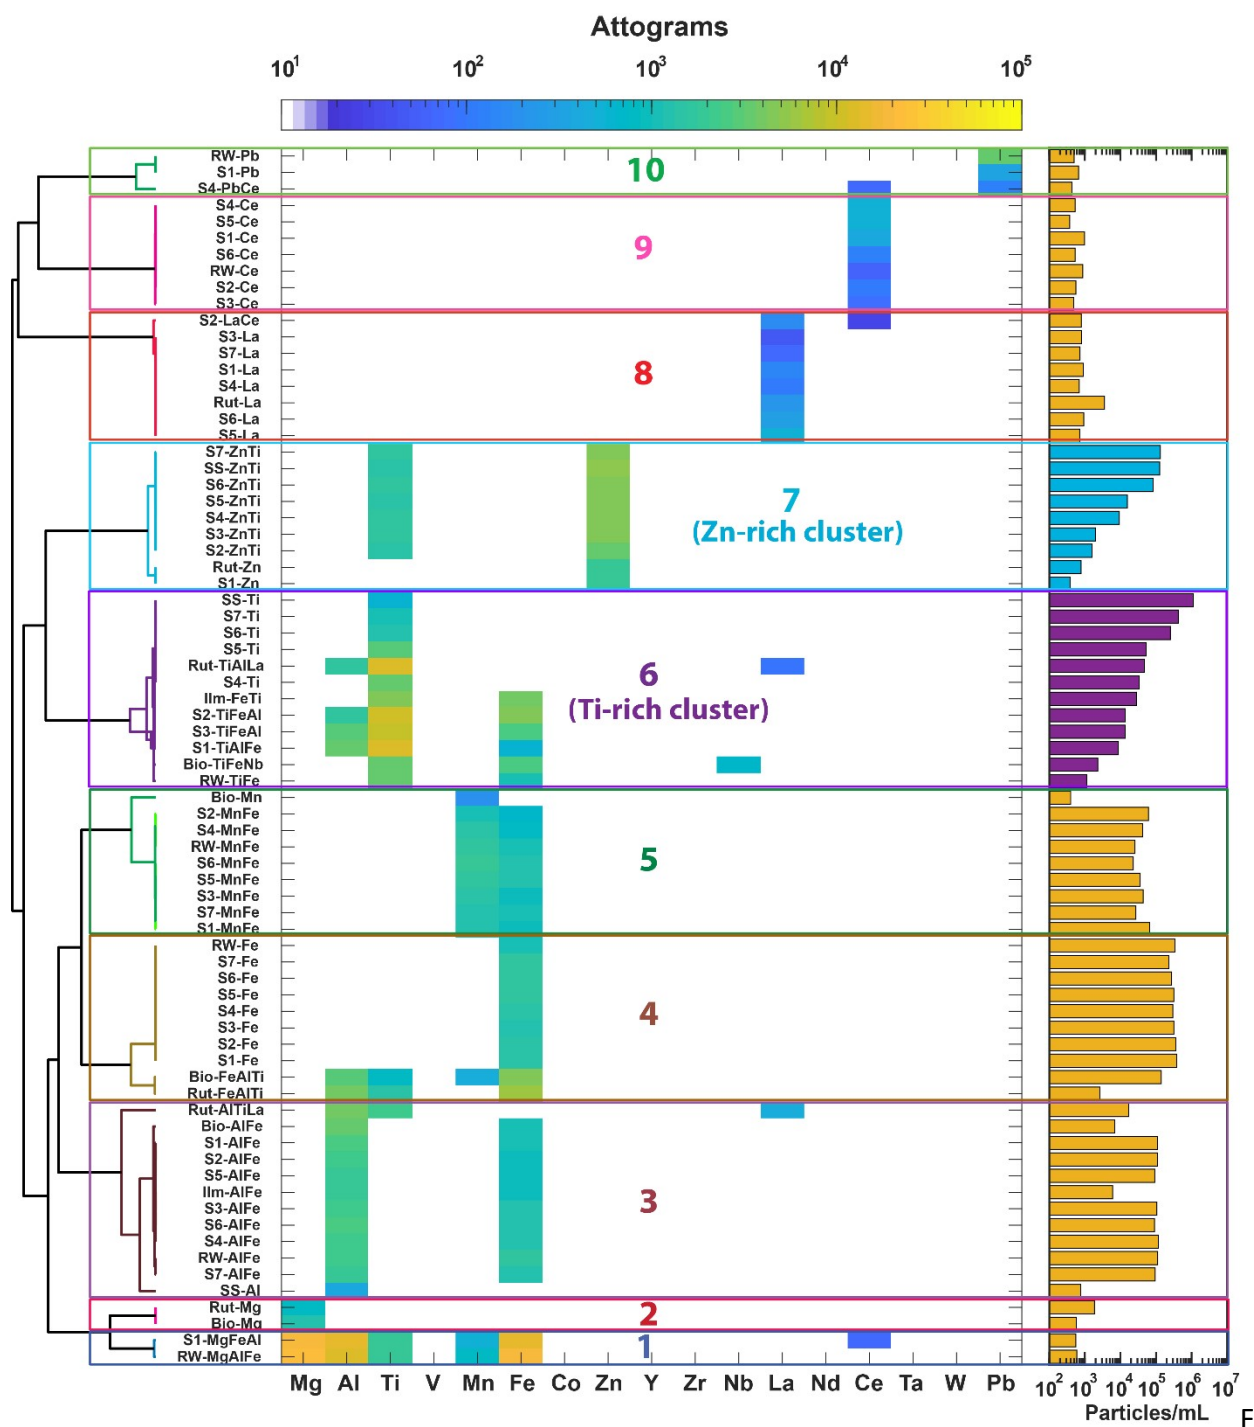

figure S4: Dendrogram from two-stage unsupervised hierarchical clustering analysis (HCA) of SS + RW + Ti-mineral samples. The heat map indicates the occurrence-normalized mean mass of each element in the found particle-class proxy (PCP) from the 1<sup>st</sup>-stage (intra-sample) clustering and the PNCs (particles mL<sup>-1</sup>) of each PNC are provided as bars on the right.

Results from two-stage HCA where sunscreen particles are spiked in RW with enriched Ti-minerals (rutile, ilmenite and biotite) are provided in Figure S4. Particle-class proxies (PCPs) from 1<sup>st</sup> stage of HCA are grouped into a total of ten major clusters, numbered 1-10. Each of the PCP is identified as the name of sample (SS-sunscreen, RW-river water, rut-rutile, ilm-ilmenite, bio-biotite and S1-S7 for mixtures of RW, Ti- nanominerals and SS with increasing concentrations of SS particles). Like what we observed in Figure 3, SS-derived clusters (Ti-rich and Zn-rich clusters) are distinct from the RW + Ti- nanominerals derived clusters (clusters 1, 2, 3, 4, 5, 8, 9 and 10); however, the Ti-rich cluster is more influenced by Ti-particles from the Ti- nanominerals. PCPs originating from RW (RW-TiFe) and added Ti- nanominerals (Bio-TiFeNb, Ilm-FeTi and Rut-TiAlLa) are also clustered along with the SS PCP (SS-Ti). In the Ti-rich cluster, the most dilute samples (S1, S2 and S3) show elevated PNCs due to Ti-particles from RW and Ti-nanominerals. On the other hand, the Zn-rich cluster does not contain RW particles, and is minimally influenced by added rutile Zn-particles. Such Zn-rich particles from rutile are unlikely to be present in environmental samples such a river water or soil unless the sampling site is rich in rutile mineral or a Zn-bearing mineral.

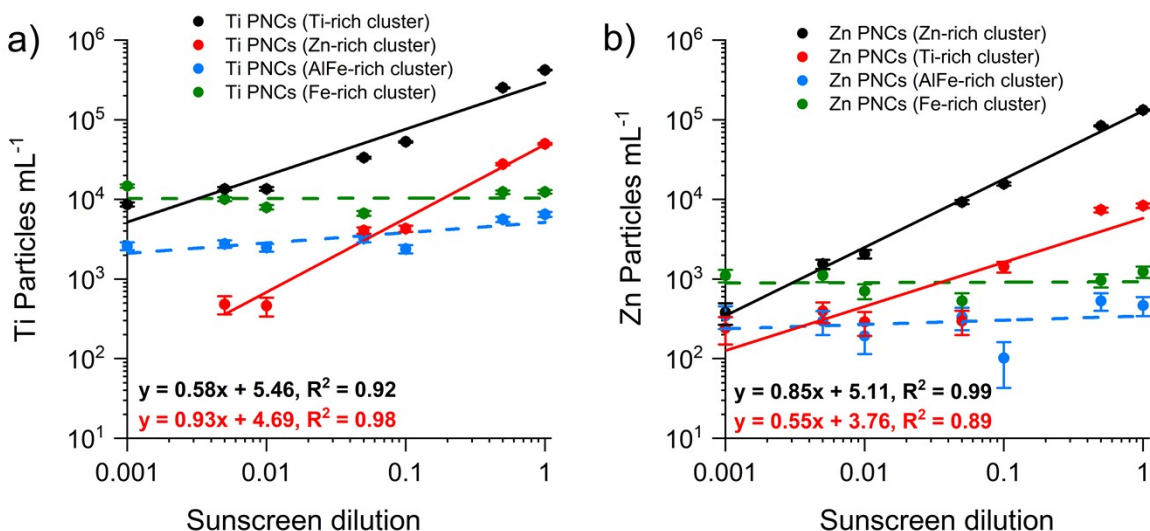

Figure S5: Quantification of Ti-bearing NPs **(a)** and Zn-bearing NPs **(b)** spiked from sunscreen into river water enriched Ti-nanominerals. Data points plotted are based on particles  $\text{mL}^{-1}$  present in merged (triplicate measurements merged for HCA) data files. Error bars plotted are the predicted standard deviation based on Poisson-Normal statistics.

As we discussed earlier, the Ti-rich and Zn-rich clusters are considered to be characteristic of SS and, the AlFe-rich and Fe-rich clusters are considered to be characteristic of RW. Figure S4 shows the results of two-stage HCA of neat and mixed samples (mixture of SS, RW and Ti-nanominerals). In Figure S5, we present quantification of the SS particles spiked in RW enriched with Ti-

nanominerals. Ti and Zn particles present in spiked samples S1-S7 were extracted from SS derived clusters (Ti-rich and Zn-rich). Additionally, Ti and Zn particles were also extracted from RW enriched with Ti-nanominerals clusters, specifically cluster 3 (AlFe-rich cluster) and cluster 4 (Fe-rich cluster). These clusters can be seen in Figure S4. SS derived Ti PNCs and Zn PNCs are plotted in Fig. S5a and Fig. S5b, respectively, against the Ti and Zn PNCs derived from RW enriched with Ti-nanominerals. On a log-log plot, a slope of 1 indicate linear response. The slope of Ti-PNCs in Fig. S5a is significantly lower than 1 and also lower than the slope of Ti-PNCs spiked in RW without enriched Ti-nanominerals (see Fig. 5a). The non-linearity of the Ti PNCs in the Ti-rich cluster is due to influence Ti-particles from added Ti-nanominerals. On the other hand, for Ti-containing particles in the Zn-rich cluster, the PNC vs. dilution amount has slope of 0.93, which indicating that Ti-particles in Zn-rich cluster could be a reliable measure to classify the SS particles. We also find linear increment of Zn particles in Zn-rich cluster with increase in the concentration of SS. The slope is less than 1 due presence of small number of Zn particles in RW water which artificially increases the PNCs of Zn, as compared to the expected Zn PNCs from SS, especially in samples with the most dilute SS particle suspensions.
